# Supplementary material
Source: PubMed Central journal article supplement (PMC3062011)
Supplement: ejhg2010177x4.pdf [file ejhg2010177x4.pdf]

Table S4: BATWING estimates of median bifurcation times and 95% confidence intervals for Muslim and Christian trees, including the other groups and Cyprus as outgroups.

| Node                                                   | time (ybp) | 95%CI (ybp) |
|--------------------------------------------------------|------------|-------------|
| (LNU,LMU)                                              | 950        | 205 - 2320  |
| ((LNU,LMU),LSH)                                        | 1525       | 1075 - 2675 |
| (LMD,((LNU,LMU),LSH))                                  | 1775       | 1275 - 2925 |
| ((LMD,((LNU,LMU),LSH)),LBH)                            | 2125       | 1400 - 3475 |
| ((LMD,((LNU,LMU),LSH)),LBH),LSU)                       | 2725       | 1775 - 3850 |
| ((((LMD,((LNU,LMU),LSH)),LBH),LSU),Christian)          | 3325       | 1875 - 4225 |
| (((((LMD,((LNU,LMU),LSH)),LBH),LSU),Christian),Cyprus) | 3950       | 2025 - 5800 |
| (LZM,LMO)                                              | 1075       | 450 - 2400  |
| (LMM,LNO)                                              | 1400       | 775 - 2675  |
| (LNM,(LZM,LMO))                                        | 1625       | 850 - 2850  |
| ((LNM,(LZM,LMO)),(LMM,LNO))                            | 1925       | 1200 - 3675 |
| ((((LNM,(LZM,LMO)),(LMM,LNO)),LNC)                     | 2500       | 1475 - 4225 |
| (((((LNM,(LZM,LMO)),(LMM,LNO)),LNC),Muslim)            | 3475       | 2000 - 6025 |
| ((((((LNM,(LZM,LMO)),(LMM,LNO)),LNC),Muslim),Cyprus)   | 4025       | 2525 - 8400 |
